# Supplementary material
Source: Springer Nature journal article supplement (https://www.springermedizin.de/resource/supplementary/12955_2014_1346_MOESM2_ESM.pdf/9559418)

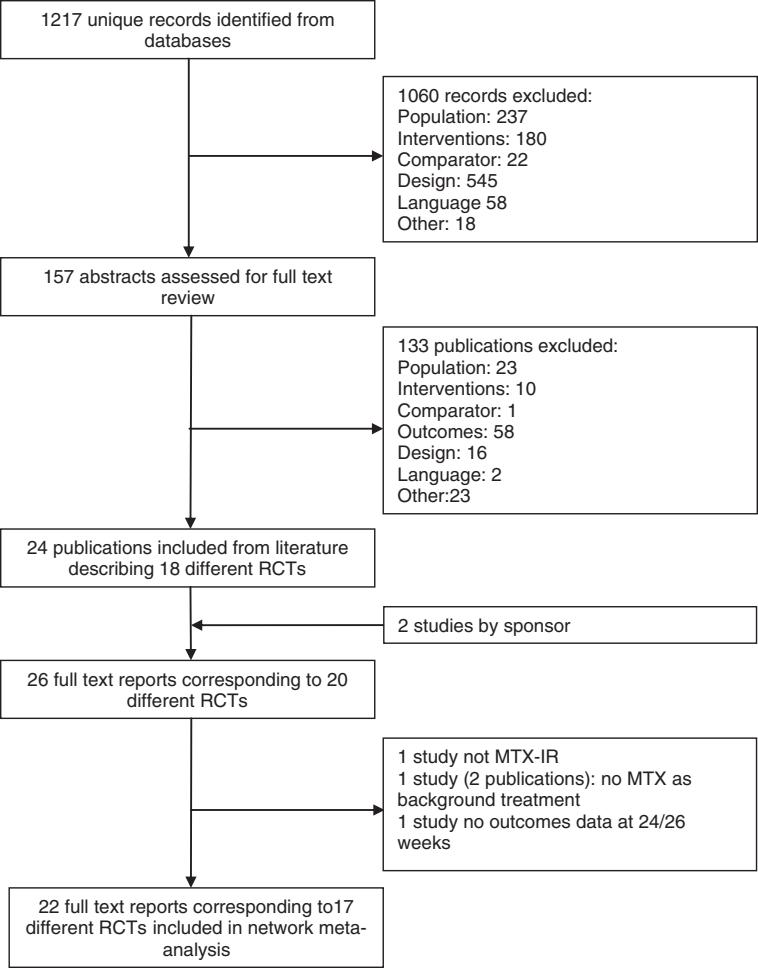

Supplement: MOESM2 [file 9559418]
